# Supplementary material
Source: PubMed Central journal article supplement (PMC5006224)
Supplement: supp_kwv155_kwv155supp.pdf [file supp_kwv155_kwv155supp.pdf]

## WEB MATERIALS

### “Seroepidemiology of human polyomaviruses in a United States population”

#### Included in the Web Material:

**Web Table 1.** Distribution of Human Polyomavirus (PyV) Seropositivity among 460 Study Participants by Sociodemographic Factors, New Hampshire, USA (1993-1995).

**Web Table 2.** Distribution of Human Polyomavirus (PyV) Seropositivity among 194 Study Participants by Sociodemographic Factors, New Hampshire, USA (1993-1995).

**Web Figure 1.** Robustness of human polyomavirus (PyV) seroprevalence estimates as determined by VP1 seroreactivity among 460 study participants, New Hampshire, USA (1993-1995). The cut points were varied from 50 to 450 median fluorescence intensity (MFI) units (x axis), and the resulting seroprevalences were calculated using the new cutoffs (y axis). The red cross hairs show the seroprevalences for each PyV VP1 using the recommended cutoff=250 MFI units. The two red dots show the range of MFI units that would result in seroprevalences  $\pm 1\%$  of the seroprevalences calculated using the recommended cutoff. The blue crosses denote the cut points calculated using a frequency distribution analysis as described in van der Meijden *et al*, 2013 (34), with two JC cutoffs calculated using 1 bin versus 2 bins to illustrate the large difference in seroprevalence estimates depending upon binned samples included.

**Web Figure 2.** Phylogenetic tree relating human polyomaviruses (PyV) from human isolates (left). This simplified tree was constructed from the complete genome sequences aligned using MUSCLE 3.8.31 with default parameters. Branch length is in substitutions per site. The RefSeq accession numbers for the viruses are listed in the text. Spearman rank correlation coefficients,  $\rho$ , between the median fluorescence intensity (MFI) values against each PyV VP1 antigen among 460 study participants from New Hampshire, USA (1993-1995) are shown (right), where \*  $P < 0.05$ , \*\*  $P < 0.01$ , \*\*\*  $P < 0.001$ .

**Web Figure 3.** Spearman rank correlation coefficients,  $\rho$ , between immune cell proportions and median fluorescence intensity (MFI) values for each human polyomavirus (PyV) VP1 among 194 study participants, New Hampshire, USA (1993-1995). The red square emphasizes the correlations between immune cell proportions and MFI values for each PyV.

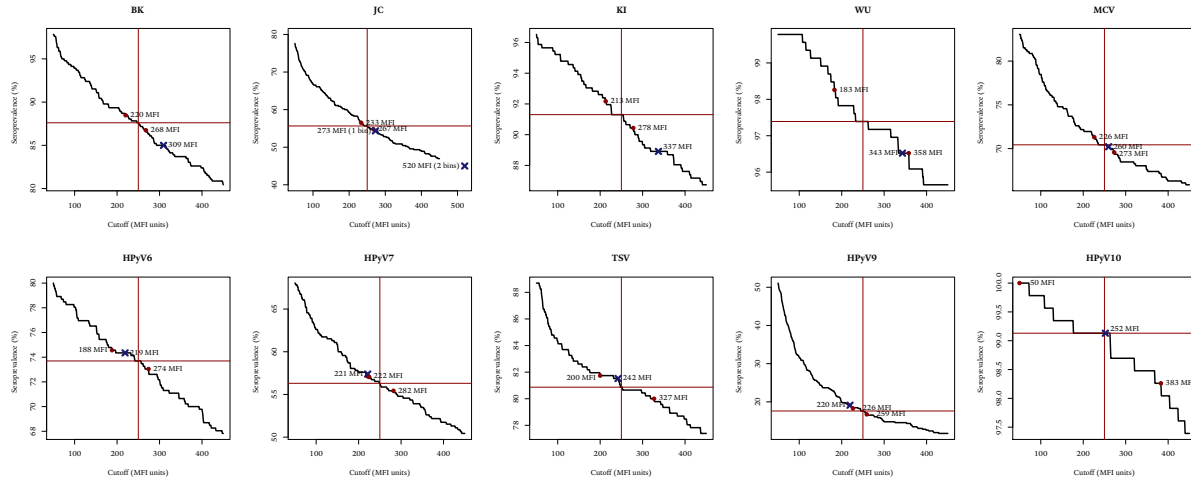

**Web Figure 1.** Robustness of human polyomavirus (PyV) seroprevalence estimates as determined by VP1 seroreactivity among 460 study participants, New Hampshire, USA (1993-1995). The cut points were varied from 50 to 450 median fluorescence intensity (MFI) units (x axis), and the resulting seroprevalences were calculated using the new cutoffs (y axis). The red cross hairs show the seroprevalences for each PyV VP1 using the recommended cutoff=250 MFI units. The two red dots show the range of MFI units that would result in seroprevalences  $\pm 1\%$  of the seroprevalences calculated using the recommended cutoff. The blue crosses denote the cut points calculated using a frequency distribution analysis as described in van der Meijden *et al.*, 2013 (34), with two JC cutoffs calculated using 1 bin versus 2 bins to illustrate the large difference in seroprevalence estimates depending upon binned samples included.

**Web Table 1.** Distribution of Human Polyomavirus (PyV) Seropositivity among 460 Study Participants by Sociodemographic Factors, New Hampshire, USA (1993-1995).<sup>a</sup>

| Variable                               | Total <sup>d</sup> |     | No. PyV types seropositive, mean (SD) <sup>e</sup> | Seropositive <sup>b,c</sup> |      |     |                   |     |      |     |      |     |                     |       |      |       |                      |     |                     |       |                    |        |      |
|----------------------------------------|--------------------|-----|----------------------------------------------------|-----------------------------|------|-----|-------------------|-----|------|-----|------|-----|---------------------|-------|------|-------|----------------------|-----|---------------------|-------|--------------------|--------|------|
|                                        | No.                | %   |                                                    | BK                          |      | JC  |                   | KI  |      | WU  |      | MCV |                     | HPyV6 |      | HPyV7 |                      | TSV |                     | HPyV9 |                    | HPyV10 |      |
|                                        |                    |     |                                                    | No.                         | %    | No. | %                 | No. | %    | No. | %    | No. | %                   | No.   | %    | No.   | %                    | No. | %                   | No.   | %                  | No.    | %    |
| Overall                                | 460                | 100 | 7.3 (1.4)                                          | 403                         | 87.6 | 256 | 55.6 <sup>†</sup> | 420 | 91.3 | 448 | 97.4 | 324 | 70.4 <sup>†††</sup> | 339   | 73.7 | 259   | 56.3 <sup>††</sup>   | 372 | 80.9                | 81    | 17.6               | 456    | 99.1 |
| Gender                                 |                    |     |                                                    |                             |      |     |                   |     |      |     |      |     |                     |       |      |       |                      |     |                     |       |                    |        |      |
| Male                                   | 280                | 100 | 7.5 (1.5) <sup>***</sup>                           | 246                         | 87.8 | 168 | 60.0*             | 256 | 91.4 | 271 | 96.8 | 204 | 72.8                | 212   | 75.7 | 164   | 58.6                 | 239 | 85.4 <sup>***</sup> | 54    | 19.3               | 277    | 98.9 |
| Female                                 | 180                | 100 | 7.0 (1.3)                                          | 157                         | 87.2 | 88  | 48.9              | 164 | 91.1 | 177 | 98.3 | 120 | 66.7                | 127   | 70.6 | 95    | 52.8                 | 133 | 73.9                | 27    | 15.0               | 179    | 99.4 |
| Education                              |                    |     |                                                    |                             |      |     |                   |     |      |     |      |     |                     |       |      |       |                      |     |                     |       |                    |        |      |
| Elementary to high or technical school | 227                | 100 | 7.4 (1.4)                                          | 201                         | 88.5 | 126 | 55.5              | 211 | 93.0 | 221 | 97.4 | 163 | 71.8                | 169   | 74.4 | 131   | 57.7                 | 193 | 85.0                | 41    | 18.1               | 226    | 99.6 |
| Any college                            | 144                | 100 | 7.1 (1.4)                                          | 123                         | 85.4 | 78  | 54.2              | 128 | 88.9 | 140 | 97.2 | 99  | 68.8                | 102   | 70.8 | 77    | 53.5                 | 110 | 76.4                | 18    | 12.5               | 142    | 98.6 |
| Graduate or professional school        | 89                 | 100 | 7.4 (1.6)                                          | 79                          | 88.8 | 52  | 58.4              | 81  | 91.0 | 87  | 97.8 | 62  | 69.7                | 68    | 76.4 | 51    | 57.3                 | 69  | 77.5                | 22    | 24.7               | 88     | 98.9 |
| Smoking status                         |                    |     |                                                    |                             |      |     |                   |     |      |     |      |     |                     |       |      |       |                      |     |                     |       |                    |        |      |
| Never                                  | 146                | 100 | 7.3 (1.3)                                          | 130                         | 89.0 | 81  | 55.5              | 133 | 91.1 | 145 | 99.3 | 111 | 76.0* <sup>‡</sup>  | 103   | 70.5 | 79    | 54.1                 | 119 | 81.5                | 15    | 10.3* <sup>‡</sup> | 144    | 98.6 |
| Former                                 | 230                | 100 | 7.4 (1.5)                                          | 205                         | 89.1 | 128 | 55.6              | 210 | 91.3 | 222 | 96.5 | 159 | 69.1                | 178   | 77.4 | 138   | 60.0                 | 191 | 83.0                | 49    | 21.3               | 228    | 99.1 |
| Current                                | 84                 | 100 | 7.0 (1.6)                                          | 68                          | 81.1 | 47  | 56.0              | 77  | 91.7 | 81  | 96.4 | 54  | 64.3                | 58    | 69.0 | 42    | 50.0                 | 62  | 73.8                | 17    | 20.2               | 84     | 100  |
| Glucocorticoid use <sup>f</sup>        |                    |     |                                                    |                             |      |     |                   |     |      |     |      |     |                     |       |      |       |                      |     |                     |       |                    |        |      |
| Yes                                    | 39                 | 100 | 7.4 (1.3)                                          | 35                          | 89.7 | 22  | 56.4              | 36  | 92.3 | 37  | 94.9 | 23  | 59.0                | 30    | 76.9 | 30    | 76.9 <sup>***‡</sup> | 32  | 82.0                | 5     | 12.8               | 39     | 100  |
| No                                     | 415                | 100 | 7.3 (1.4)                                          | 363                         | 87.5 | 231 | 55.7              | 278 | 67.0 | 406 | 97.8 | 296 | 71.3                | 305   | 73.5 | 226   | 54.4                 | 334 | 80.5                | 74    | 17.8               | 411    | 99.0 |

<sup>a</sup> Numbers may not sum to the overall total due to missing data.

<sup>b</sup> Percentages indicate the proportion of healthy adults who are PyV seropositive versus PyV seronegative in each given strata.

<sup>c</sup> PyV infection was determined using seropositivity for the VP1 protein.

<sup>d</sup> All participants were seropositive for at least one of the ten PyVs assayed.

<sup>e</sup> Standard deviation referred to as "SD".

<sup>f</sup> Glucocorticoid use was defined as having used oral steroid or corticosteroid medications (for example, cortisone or prednisone) for one month or longer.

<sup>‡</sup> Age group and gender-adjusted *P*-value, as determined by logistic regression.

<sup>†</sup> *P* < 0.05, <sup>††</sup> *P* < 0.01, <sup>†††</sup> *P* < 0.005 to test *P* for trend across age groups 25-44 (n=46), 45-54 (n=70), 55-64 (n=106), 65-69 (n=131), and 70-75 (n=107) years.

\* *P* < 0.05, \*\* *P* < 0.01, \*\*\* *P* < 0.005 to test difference in proportions between groups, as determined by X<sup>2</sup> or Fisher's exact tests for categorical variables, and by Kruskal-Wallis or Wilcoxon rank sum tests for continuous variables.

**Web Table 2.** Distribution of Human Polyomavirus (PyV) Seropositivity among 194 Study Participants by Sociodemographic Factors, New Hampshire, USA (1993-1995).<sup>a</sup>

| Variable                               | Total, No. (%) <sup>d</sup> | No. PyV types seropositive, mean (SD) <sup>e</sup> | Seropositive, No. (%) <sup>b,c</sup> |            |            |            |            |            |            |            |           |            |
|----------------------------------------|-----------------------------|----------------------------------------------------|--------------------------------------|------------|------------|------------|------------|------------|------------|------------|-----------|------------|
|                                        |                             |                                                    | BK                                   | JC         | KI         | WU         | MCV        | HPyV6      | HPyV7      | TSV        | HPyV9     | HPyV10     |
| Overall                                | 194 (100)                   | 7.3 (1.4)                                          | 164 (84.5)                           | 105 (54.1) | 177 (91.2) | 189 (97.4) | 130 (67.0) | 144 (74.2) | 120 (61.8) | 163 (84.0) | 38 (19.6) | 192 (99.0) |
| Gender                                 |                             |                                                    |                                      |            |            |            |            |            |            |            |           |            |
| Male                                   | 121 (100)                   | 7.4 (1.6)                                          | 101 (83.5)                           | 69 (57.0)  | 111 (91.7) | 118 (97.5) | 82 (67.8)  | 91 (75.2)  | 79 (65.3)  | 107 (88.4) | 24 (19.8) | 120 (99.2) |
| Female                                 | 73 (100)                    | 7.1 (1.2)                                          | 63 (86.3)                            | 36 (49.3)  | 66 (90.4)  | 71 (97.3)  | 48 (65.7)  | 53 (72.6)  | 41 (56.2)  | 56 (76.7)  | 14 (19.2) | 72 (98.6)  |
| Age (years)                            |                             |                                                    |                                      |            |            |            |            |            |            |            |           |            |
| <45                                    | 23 (100)                    | 6.5 (1.3)                                          | 22 (95.6)                            | 8 (34.8)   | 19 (82.6)  | 23 (100)   | 14 (60.9)  | 17 (73.9)  | 8 (34.8)   | 17 (73.9)  | 2 (8.7)   | 23 (100)   |
| 45-54                                  | 28 (100)                    | 7.4 (1.7)                                          | 26 (92.8)                            | 15 (53.6)  | 24 (85.7)  | 27 (96.4)  | 19 (67.9)  | 23 (82.1)  | 17 (60.7)  | 23 (82.1)  | 6 (21.4)  | 27 (96.4)  |
| 55-64                                  | 45 (100)                    | 7.4 (1.3)                                          | 38 (84.4)                            | 27 (60.0)  | 43 (85.6)  | 44 (97.8)  | 34 (75.6)  | 31 (68.9)  | 25 (55.6)  | 40 (88.9)  | 8 (17.8)  | 44 (97.8)  |
| 65-69                                  | 52 (100)                    | 7.3 (1.5)                                          | 42 (80.8)                            | 32 (61.5)  | 47 (90.4)  | 50 (96.1)  | 30 (57.7)  | 37 (71.2)  | 38 (73.1)  | 44 (84.6)  | 9 (17.3)  | 52 (100)   |
| 70-75                                  | 46 (100)                    | 7.5 (1.4)                                          | 36 (78.3)                            | 23 (50.0)  | 44 (95.6)  | 45 (97.8)  | 33 (71.7)  | 36 (78.3)  | 32 (69.6)  | 39 (84.8)  | 13 (28.3) | 46 (100)   |
| Education                              |                             |                                                    |                                      |            |            |            |            |            |            |            |           |            |
| Elementary to high or technical school | 98 (100)                    | 7.3 (1.4)                                          | 83 (84.7)                            | 53 (54.1)  | 94 (95.9)  | 95 (96.9)  | 64 (65.3)  | 69 (70.4)  | 57 (58.2)  | 87 (88.8)  | 18 (18.4) | 97 (99.0)  |
| Any college                            | 59 (100)                    | 7.1 (1.4)                                          | 50 (84.7)                            | 28 (47.5)  | 52 (88.1)  | 57 (96.6)  | 40 (67.8)  | 44 (74.6)  | 37 (62.7)  | 46 (78.0)  | 7 (11.9)  | 59 (100)   |
| Graduate or professional school        | 37 (100)                    | 7.7 (1.6)                                          | 31 (83.8)                            | 24 (64.9)  | 31 (83.8)  | 37 (100)   | 26 (70.2)  | 31 (83.8)  | 26 (70.3)  | 30 (81.1)  | 13 (35.1) | 36 (97.3)  |
| Smoking status                         |                             |                                                    |                                      |            |            |            |            |            |            |            |           |            |
| Never                                  | 64 (100)                    | 7.2 (1.3)                                          | 56 (87.5)                            | 32 (50.0)  | 57 (89.1)  | 63 (98.4)  | 49 (76.6)  | 43 (67.2)  | 37 (57.8)  | 57 (89.1)  | 6 (9.4)   | 62 (96.9)  |
| Former                                 | 97 (100)                    | 7.4 (1.5)                                          | 82 (84.5)                            | 53 (54.6)  | 90 (92.8)  | 93 (95.9)  | 64 (66.0)  | 76 (78.4)  | 65 (67.0)  | 77 (79.4)  | 25 (25.8) | 97 (100)   |
| Current                                | 33 (100)                    | 7.2 (1.4)                                          | 26 (78.8)                            | 20 (60.6)  | 30 (90.9)  | 33 (100)   | 17 (51.5)  | 25 (75.8)  | 18 (54.5)  | 29 (87.9)  | 7 (21.2)  | 33 (100)   |
| Glucocorticoid use <sup>f</sup>        |                             |                                                    |                                      |            |            |            |            |            |            |            |           |            |
| Yes                                    | 22 (100)                    | 7.4 (1.4)                                          | 19 (86.3)                            | 12 (54.5)  | 21 (95.4)  | 21 (95.4)  | 13 (59.1)  | 16 (72.7)  | 18 (81.8)  | 18 (81.8)  | 3 (13.6)  | 22 (100)   |
| No                                     | 168 (100)                   | 7.3 (1.4)                                          | 142 (84.5)                           | 92 (54.8)  | 152 (90.5) | 165 (98.2) | 114 (67.9) | 126 (75.0) | 101 (60.1) | 141 (83.9) | 34 (20.2) | 166 (98.8) |
| Transplant recipient                   |                             |                                                    |                                      |            |            |            |            |            |            |            |           |            |
| Yes                                    | 0                           | NA                                                 | 0                                    | 0          | 0          | 0          | 0          | 0          | 0          | 0          | 0         | 0          |
| No                                     | 193 (100)                   | 7.3 (1.4)                                          | 164 (85.0)                           | 105 (54.4) | 176 (91.2) | 188 (97.4) | 129 (66.8) | 143 (74.1) | 120 (62.2) | 162 (83.9) | 38 (19.7) | 191 (99.0) |

<sup>a</sup> Numbers may not sum to the overall total due to missing data.

<sup>b</sup> Percentages indicate the proportion of healthy adults who are PyV seropositive versus PyV seronegative in each given strata.

<sup>c</sup> PyV infection was determined using seropositivity for the VP1 protein.

<sup>d</sup> All participants were seropositive for at least one of the ten PyVs assayed.

<sup>e</sup> Standard deviation referred to as "SD".

<sup>f</sup> Glucocorticoid use was defined as having used oral steroid or corticosteroid medications (for example, cortisone or prednisone) for one month or longer.

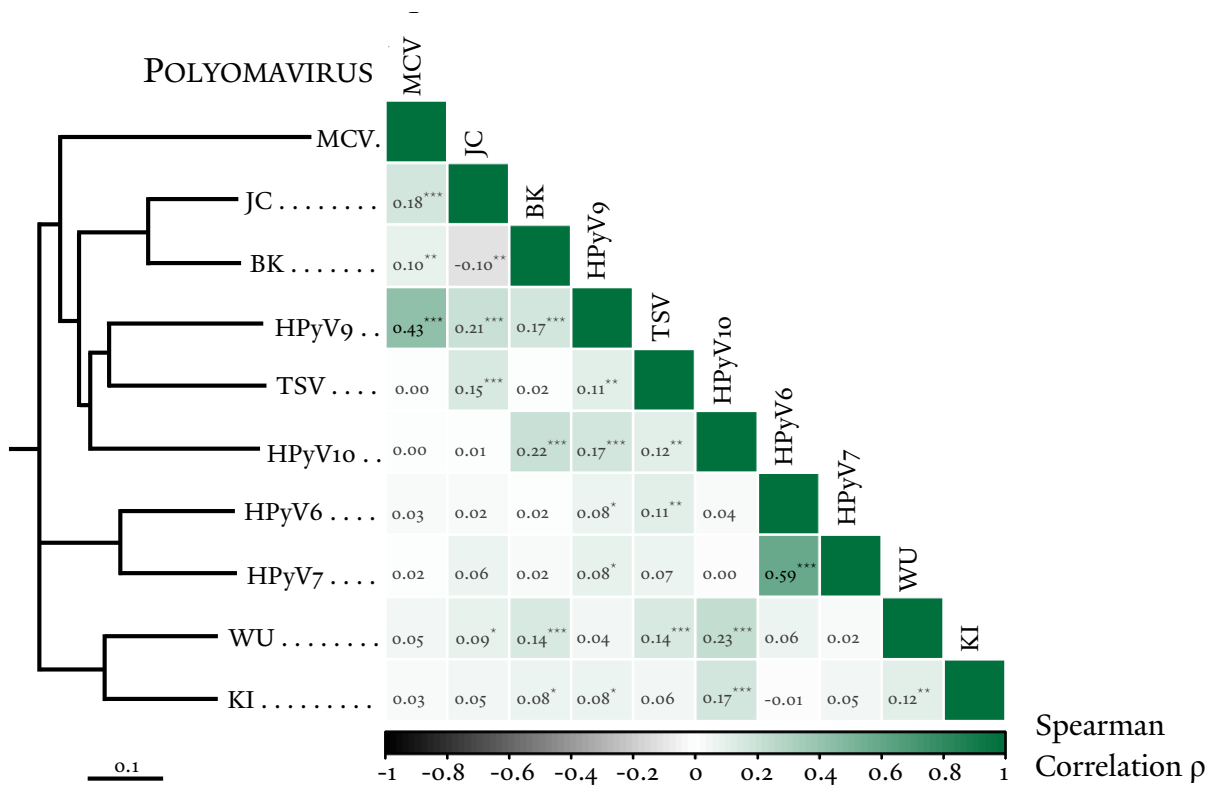

**Web Figure 2.** Phylogenetic tree relating human polyomaviruses (PyV) from human isolates (left). This simplified tree was constructed from the complete genome sequences aligned using MUSCLE 3.8.31 with default parameters. Branch length is in substitutions per site. The RefSeq accession numbers for the viruses are listed in the text. Spearman rank correlation coefficients,  $\rho$ , between the median fluorescence intensity (MFI) values against each PyV VP1 antigen among 460 study participants from New Hampshire, USA (1993-1995) are shown (right), where \*  $P < 0.05$ , \*\*  $P < 0.01$ , \*\*\*  $P < 0.001$ .

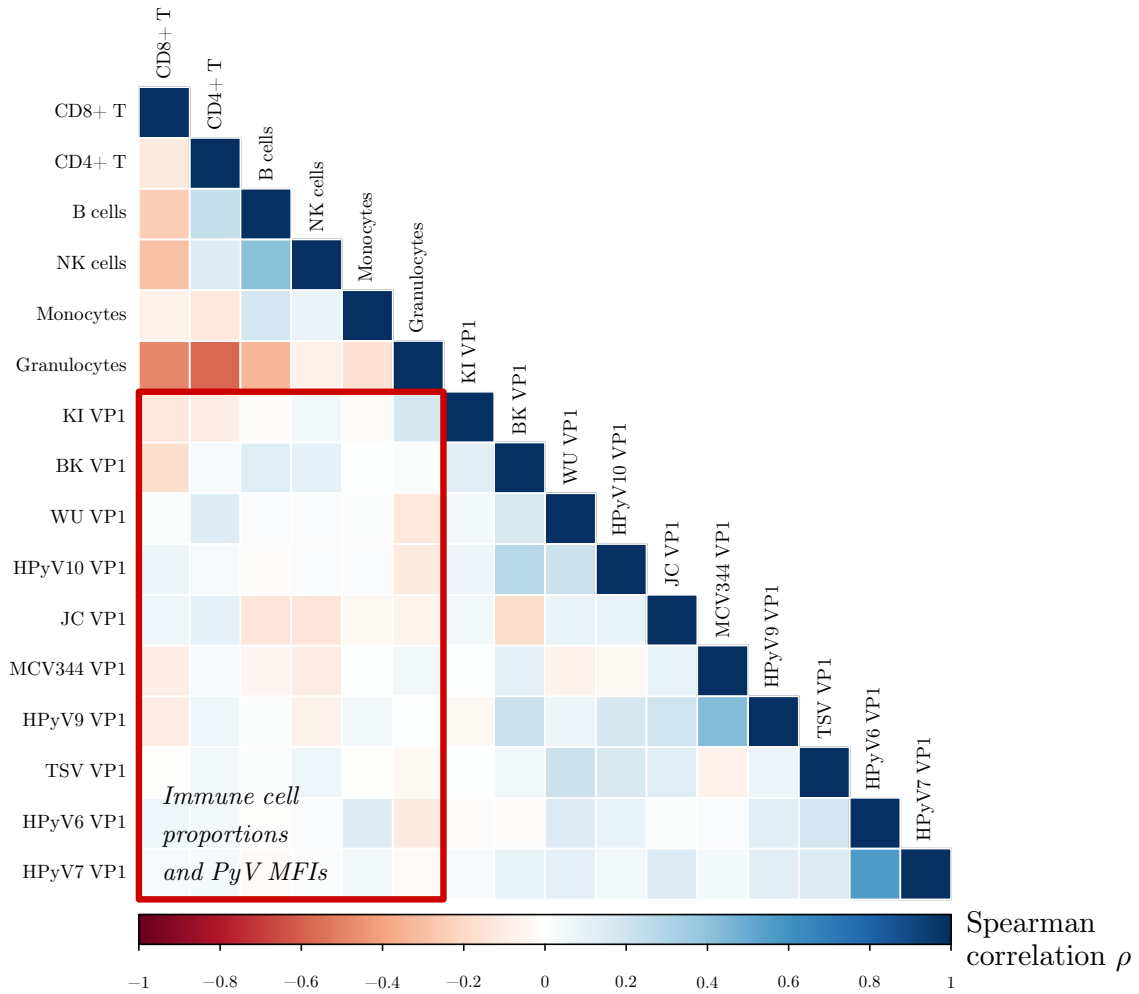

**Web Figure 3.** Spearman rank correlation coefficients,  $\rho$ , between immune cell proportions and median fluorescence intensity (MFI) values for each human polyomavirus (PyV) VP1 among 194 study participants, New Hampshire, USA (1993-1995). The red square emphasizes the correlations between immune cell proportions and MFI values for each PyV.
